# Supplementary material
Source: PubMed Central journal article supplement (PMC6551791)
Supplement: ASN.2018080852SupplementaryData.pdf [file ASN.2018080852SupplementaryData.pdf]

## **Supplement: Table of contents**

Page 2. Supplement table showing details of laser microdissection of EXT1/EXT2-associated MN cases

Page 3-7. Supplement figure 1: Immunohistochemical staining for EXT1 and EXT2 in EXT1/EXT2-associated MN cases and control cases. EXT2 staining is also shown in 3 EXT1/EXT2-associated MN cases.

Page 8. Supplement figure 2: Representative mass spectrometry findings of control cases.

Page 9-10. Supplement figure 3: Example of MS/MS spectra match to sequence from EXT1 and EXT2.

Page 11-14. Details of methods.

Page 15-20. Clinical, laboratory and kidney biopsy findings of validation cohort.

Supplement table 1. Laser microdissection: number of glomeruli dissected and cut area/case.

| <b>Case number</b> | <b>Number of glomeruli dissected</b> | <b>Cut area square microns</b> |
|--------------------|--------------------------------------|--------------------------------|
| <b>Case 1</b>      | 8                                    | 127231                         |
| <b>Case 2</b>      | 25                                   | 642922                         |
| <b>Case 3</b>      | 8                                    | 143755                         |
| <b>Case 4</b>      | 30                                   | 572387                         |
| <b>Case 5</b>      | 28                                   | 570610                         |
| <b>Case 6</b>      | 10                                   | 234746                         |
| <b>Case 7</b>      | 28                                   | 573762                         |
| <b>Case 8</b>      | 17                                   | 255959                         |
| <b>Case 9</b>      | 21                                   | 335912                         |
| <b>Case 10</b>     | 23                                   | 350584                         |
| <b>Case 11</b>     | 35                                   | 589132                         |
| <b>Case 12</b>     | 20                                   | 614729                         |
| <b>Case 13</b>     | 21                                   | 531275                         |
| <b>Case 14</b>     | 9                                    | 132207                         |
| <b>Case 15</b>     | NA                                   | NA                             |
| <b>Case 16</b>     | NA                                   | NA                             |
| <b>Case 17</b>     | 25                                   | 538594                         |
| <b>Case 18</b>     | 6                                    | 169703                         |
| <b>Case 19</b>     | 12                                   | 142972                         |
| <b>Case 20</b>     | NA                                   | NA                             |
| <b>Case 21</b>     | 28                                   | 534491                         |
| <b>Case 22</b>     | 13                                   | 195501                         |
| <b>Case 23</b>     | NA                                   | NA                             |
| <b>Case 24</b>     | 19                                   | 542453                         |
| <b>Case 25</b>     | 18                                   | 544770                         |
| <b>Case 26</b>     | NA                                   | NA                             |

Supplement figure 1A: EXT1/EXT2-associated MN: Granular staining for EXT1 and EXT2 along the GBM in 5 cases of EXT1/EXT2 associated MN. The first column is case 1, column 2 is case 2, column 3 is case 5, column 4 is case 6 and column 5 is case 8 (top row EXT1, bottom row EXT2).

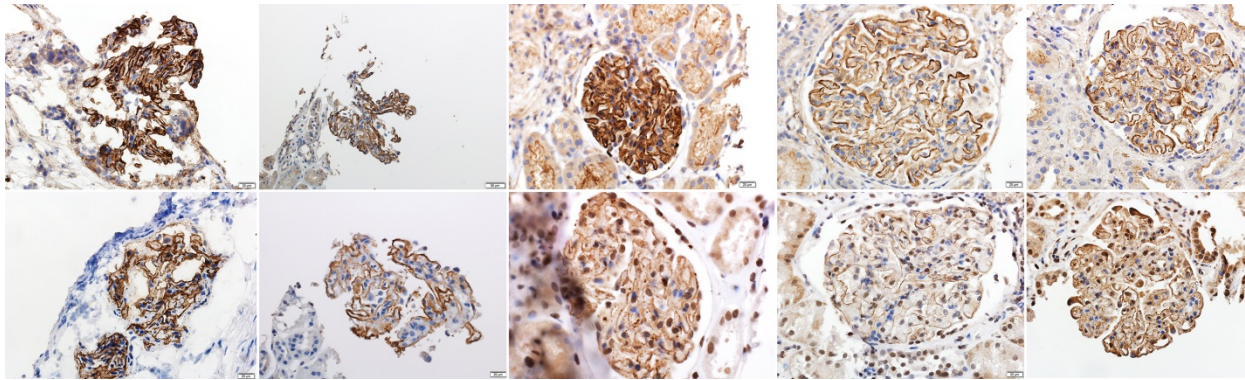

Supplement figure 1B: EXT1/EXT2-associated MN: Bright granular staining for EXT1 and EXT2 along the GBM in 5 cases of EXT1/EXT2 associated MN. The first column is case 9, column 2 is case 10, column 3 is case 11, column 4 is case 12 and column 5 is case 13 (top row EXT1, bottom row EXT2).

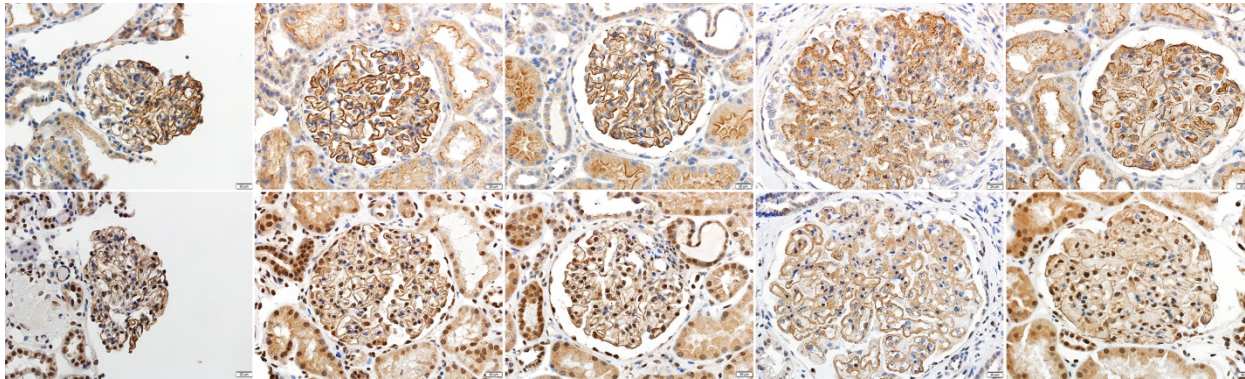

Supplement figure 1C: EXT1/EXT2-associated MN: Bright granular staining for EXT1 and EXT2 along the GBM in 5 cases of EXT1/EXT2 associated MN. The first column is case 15, column 2 is case 16, column 3 is case 17, column 4 is case 18 and column 5 is case 19 (top row EXT1, bottom row EXT2).

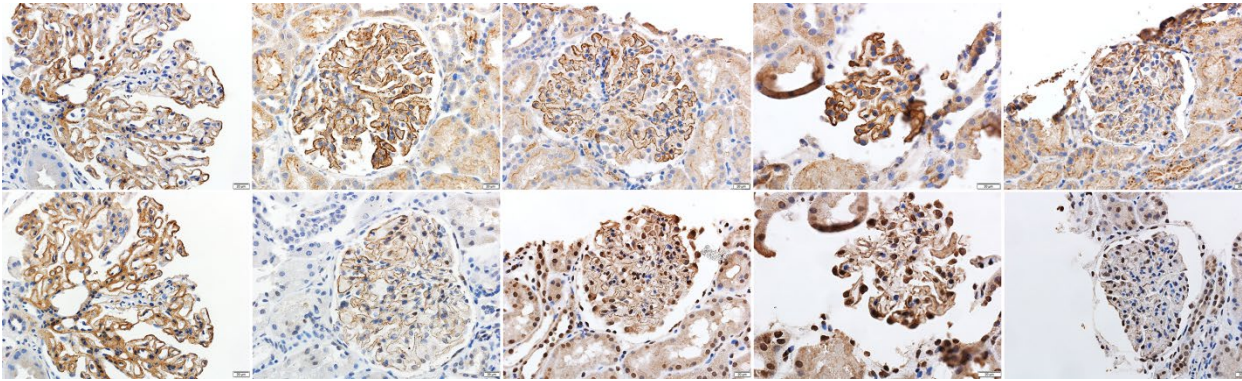

Supplement figure 1D: EXT1/EXT2-associated MN: Bright granular staining for EXT1 and EXT2 along the GBM in 5 cases of EXT1/EXT2 associated MN. The first column is case 20, column 2 is case 21, column 3 is case 22, column 4 is case 23 and column 5 is case 26 (top row EXT1, bottom row EXT2).

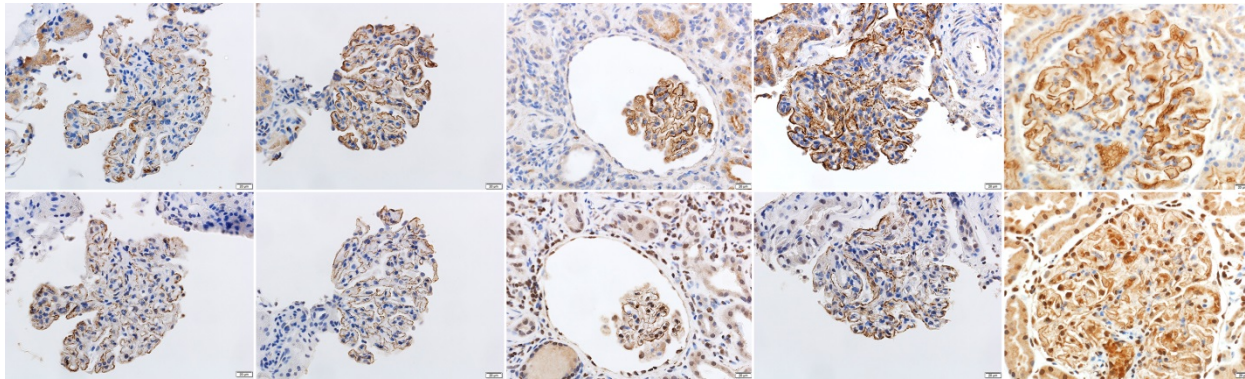



Supplement figure 1E: EXTL2 staining in 3 cases of EXT1/EXT2-associated MN: 2 cases of EXT1/EXT2-associated MN are negative for EXTL2 and one shows minimal (1+) granular staining for EXTL2 (case 5, that showed very bright EXT1/EXT2 staining).

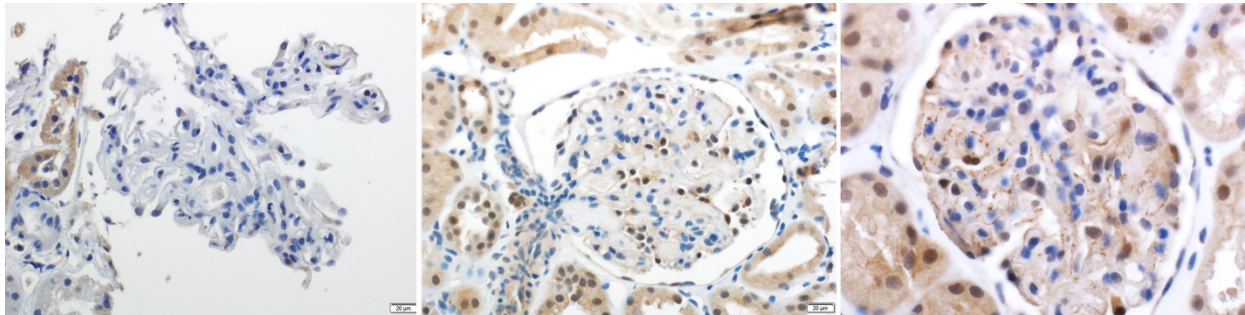

Supplement figure 1F: EXT1/EXT2 staining in control cases compared to EXT1/EXT2-associated MN: Bright granular staining for EXT1/EXT2 along the GBM in a case of EXT1/EXT2-associated MN (column 1- case 24), and negative in control cases (column 2- IgA nephropathy, column 3- minimal change disease, column 4- FSGS and column 5-diabetic glomerulosclerosis) (top row EXT1, bottom row EXT2).

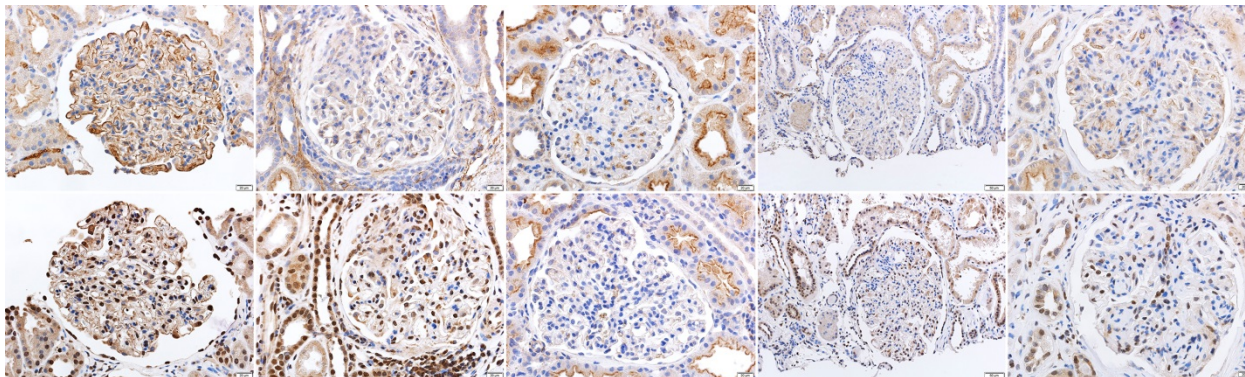

Supplement figure 2. Representative mass spectrometry findings of control cases: Low spectral counts of PLA2R and no detectable spectral counts of EXT1 or EXT2 are present in the control cases. The last 2 columns are from 2 cases of PLA2R-negative MN that were also negative for EXT1 and EXT2. Proteins inherent to the GBM such as laminin, nestin, nidogen are also shown (MCD-minimal change disease; PLA2R negative case-PLA2R-negative primary membranous nephropathy).

| Bio View:<br>2323 Proteins in 2107 Clusters<br>With 2321 Filtered Out       |  | Accession Number      | Molecular Weight | Protein Grouping Ambiguity | Diabetes Case 1 | Diabetes Case 2 | IgA Case 1 | IgA Case 2 | Primary FSGS Case 1 | Primary FSGS Case 2 | MCD Case 1 | MCD Case 2 | PLA2R negative Case 1 | PLA2R negative Case 2 |
|-----------------------------------------------------------------------------|--|-----------------------|------------------|----------------------------|-----------------|-----------------|------------|------------|---------------------|---------------------|------------|------------|-----------------------|-----------------------|
| Probability Legend:                                                         |  |                       |                  |                            |                 |                 |            |            |                     |                     |            |            |                       |                       |
| over 95%                                                                    |  |                       |                  |                            |                 |                 |            |            |                     |                     |            |            |                       |                       |
| 80% to 94%                                                                  |  |                       |                  |                            |                 |                 |            |            |                     |                     |            |            |                       |                       |
| 50% to 79%                                                                  |  |                       |                  |                            |                 |                 |            |            |                     |                     |            |            |                       |                       |
| 20% to 49%                                                                  |  |                       |                  |                            |                 |                 |            |            |                     |                     |            |            |                       |                       |
| 0% to 19%                                                                   |  |                       |                  |                            |                 |                 |            |            |                     |                     |            |            |                       |                       |
| Exostosin-2 OS=Homo sapiens GN=EXT2 PE=1 SV=1                               |  | sp Q93063 EXT2_HUMAN  | 82 kDa           | (0)                        | (0)             | (0)             | (0)        | (0)        | (0)                 | (0)                 | (0)        | (0)        | (0)                   | (0)                   |
| Exostosin-1 OS=Homo sapiens GN=EXT1 PE=1 SV=2                               |  | sp Q16394 EXT1_HUMAN  | 86 kDa           | ★                          | (0)             | (0)             | (0)        | (0)        | (0)                 | (0)                 | (0)        | (0)        | (0)                   | (0)                   |
| Secretory phospholipase A2 receptor OS=Homo sapiens GN=PLA2R1 PE=1 SV=1     |  | sp Q13018 PLA2R_HUMAN | 169 kDa          | ★                          | 5               | 3               | 2          | 4          | 3                   | 3                   | (0)        | (0)        | 3                     | 4                     |
| Laminin subunit beta-2 OS=Homo sapiens GN=LAMB2 PE=1 SV=2                   |  | sp P55268 LAMB2_HUMAN | 196 kDa          | ★                          | 161             | 166             | 230        | 176        | 154                 | 239                 | 224        | 188        | 205                   | 128                   |
| Nestin OS=Homo sapiens GN=NES PE=1 SV=2                                     |  | sp P48681 NEST_HUMAN  | 177 kDa          | ★                          | 81              | 74              | 93         | 97         | 100                 | 133                 | 163        | 177        | 90                    | 102                   |
| Nidogen-1 OS=Homo sapiens GN=NID1 PE=1 SV=3                                 |  | sp P14543 NID1_HUMAN  | 136 kDa          | ★                          | 78              | 90              | 113        | 86         | 96                  | 101                 | 98         | 87         | 146                   | 90                    |
| Vinculin OS=Homo sapiens GN=VCL PE=1 SV=4                                   |  | sp P18206 VINC_HUMAN  | 124 kDa          | ★                          | 75              | 77              | 91         | 89         | 106                 | 103                 | 119        | 129        | 147                   | 78                    |
| Heat shock protein HSP 90-alpha OS=Homo sapiens GN=HSP90AA1 PE=1 SV=1       |  | sp P07900 HS90A_HUMAN | 85 kDa           | ★                          | 35              | 31              | 29         | 30         | 32                  | 47                  | 36         | 26         | 19                    | 32                    |
| Heat shock protein HSP 90-beta OS=Homo sapiens GN=HSP90AB1 PE=1 SV=1        |  | sp P08238 HS90B_HUMAN | 83 kDa           | ★                          | 31              | 31              | 28         | 29         | 37                  | 33                  | 38         | 35         | 21                    | 30                    |
| Glyceraldehyde-3-phosphate dehydrogenase OS=Homo sapiens GN=GAPDH PE=1 SV=1 |  | sp P04406 G3P_HUMAN   | 36 kDa           | ★                          | 35              | 41              | 44         | 37         | 35                  | 47                  | 67         | 65         | 35                    | 40                    |



Supplement Figure 3.

A. The MS/MS spectra figure from Scaffold viewer of ion 867.96  $[M+2H]^{2+}$  highlighting the detected b-ions (red) and y-ions (blue) matching the theoretical fragment masses listed in the table for the Exostosin-1 peptide IAESYQNILAAIEGSR.

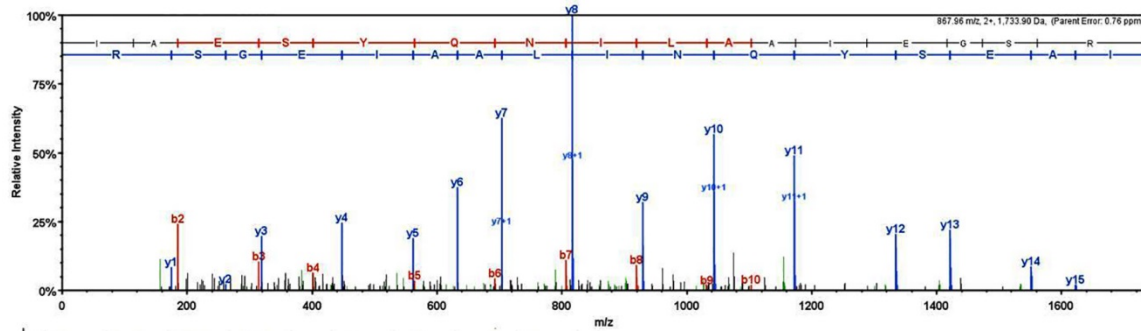

| B  | B Ions  | B+2H  | B-NH3   | B-H2O   | AA | Y Ions  | Y+2H  | Y-NH3   | Y-H2O   | Y  |
|----|---------|-------|---------|---------|----|---------|-------|---------|---------|----|
| 1  | 114.1   |       |         |         | I  | 1,734.9 | 868.0 | 1,717.9 | 1,716.9 | 16 |
| 2  | 185.1   |       |         |         | A  | 1,621.8 | 811.4 | 1,604.8 | 1,603.8 | 15 |
| 3  | 314.2   |       | 296.2   |         | E  | 1,550.8 | 775.9 | 1,533.8 | 1,532.8 | 14 |
| 4  | 401.2   |       | 383.2   |         | S  | 1,421.7 | 711.4 | 1,404.7 | 1,403.7 | 13 |
| 5  | 564.3   |       | 546.3   |         | Y  | 1,334.7 | 667.9 | 1,317.7 | 1,316.7 | 12 |
| 6  | 692.3   | 346.7 | 675.3   | 674.3   | Q  | 1,171.6 | 586.3 | 1,154.6 | 1,153.6 | 11 |
| 7  | 806.4   | 403.7 | 789.3   | 788.4   | N  | 1,043.6 | 522.3 | 1,026.6 | 1,025.6 | 10 |
| 8  | 919.5   | 460.2 | 902.4   | 901.4   | I  | 929.5   | 465.3 | 912.5   | 911.5   | 9  |
| 9  | 1,032.5 | 516.8 | 1,015.5 | 1,014.5 | L  | 816.5   | 408.7 | 799.4   | 798.4   | 8  |
| 10 | 1,103.6 | 552.3 | 1,086.5 | 1,085.6 | A  | 703.4   | 352.2 | 686.3   | 685.4   | 7  |
| 11 | 1,174.6 | 587.8 | 1,157.6 | 1,156.6 | A  | 632.3   | 316.7 | 615.3   | 614.3   | 6  |
| 12 | 1,287.7 | 644.4 | 1,270.7 | 1,269.7 | I  | 561.3   |       | 544.3   | 543.3   | 5  |
| 13 | 1,416.7 | 708.9 | 1,399.7 | 1,398.7 | E  | 448.2   |       | 431.2   | 430.2   | 4  |
| 14 | 1,473.8 | 737.4 | 1,456.7 | 1,455.7 | G  | 319.2   |       | 302.1   | 301.2   | 3  |
| 15 | 1,560.8 | 780.9 | 1,543.8 | 1,542.8 | S  | 262.2   |       | 245.1   | 244.1   | 2  |
| 16 | 1,734.9 | 868.0 | 1,717.9 | 1,716.9 | R  | 175.1   |       | 158.1   |         | 1  |

B. The MS/MS spectra figure from Scaffold viewer of ion 1278.56 [M+2H]<sup>2+</sup> highlighting the detected b-ions (red) and y-ions (blue) matching the theoretical fragment masses listed in the table for the Exostosin-2 peptide EYNELLMASDSDYYTDDINR.

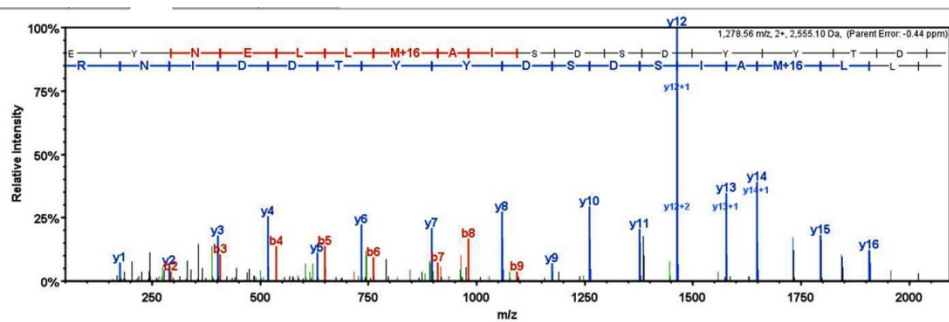

| B  | B Ions | B+2H   | B+H3   | B+H2O | AA      | Y Ions  | Y+2H    | Y+H3    | Y+H2O | Y |
|----|--------|--------|--------|-------|---------|---------|---------|---------|-------|---|
| 1  | 130.0  |        | 112.0  | E     | 2.556.1 | 1.278.6 | 2.539.1 | 2.538.1 | 21    |   |
| 2  | 293.1  |        | 275.1  | Y     | 2.427.1 | 1.214.0 | 2.410.0 | 2.409.1 | 20    |   |
| 3  | 407.2  | 390.1  | 389.1  | N     | 2.264.0 | 1.132.5 | 2.247.0 | 2.246.0 | 19    |   |
| 4  | 636.2  | 619.2  | 618.2  | E     | 2.150.0 | 1.075.5 | 2.132.9 | 2.131.9 | 18    |   |
| 5  | 864.3  | 847.3  | 846.3  | L     | 2.020.9 | 1.011.0 | 2.003.9 | 2.002.9 | 17    |   |
| 6  | 1092.4 | 1075.4 | 1074.4 | L     | 1.907.8 | 954.4   | 1.890.8 | 1.889.8 | 16    |   |
| 7  | 1320.5 | 1303.5 | 1302.5 | M+16  | 1.794.7 | 897.9   | 1.777.7 | 1.776.7 | 15    |   |
| 8  | 1548.6 | 1531.6 | 1530.6 | A     | 1.681.6 | 824.4   | 1.630.7 | 1.629.7 | 14    |   |
| 9  | 1776.7 | 1759.7 | 1758.7 | I     | 1.578.5 | 788.8   | 1.559.6 | 1.558.7 | 13    |   |
| 10 | 1904.8 | 1887.8 | 1886.8 | S     | 1.465.4 | 732.3   | 1.446.6 | 1.445.6 | 12    |   |
| 11 | 2132.9 | 2115.9 | 2114.9 | D     | 1.376.3 | 688.8   | 1.359.5 | 1.358.5 | 11    |   |
| 12 | 2361.0 | 2344.0 | 2343.0 | S     | 1.261.2 | 631.3   | 1.244.5 | 1.243.5 | 10    |   |
| 13 | 2589.1 | 2572.1 | 2571.1 | D     | 1.174.1 | 587.8   | 1.157.5 | 1.156.5 | 9     |   |
| 14 | 2817.2 | 2800.2 | 2799.2 | Y     | 1.089.0 | 530.2   | 1.042.4 | 1.041.5 | 8     |   |
| 15 | 3045.3 | 3028.3 | 3027.3 | Y     | 996.4   | 448.7   | 879.4   | 878.4   | 7     |   |
| 16 | 3273.4 | 3256.4 | 3255.4 | T     | 733.3   | 367.2   | 716.3   | 715.3   | 6     |   |
| 17 | 3501.5 | 3484.5 | 3483.5 | D     | 632.3   | 315.3   | 615.3   | 614.3   | 5     |   |
| 18 | 3729.6 | 3712.6 | 3711.6 | D     | 517.3   | 268.3   | 508.3   | 498.3   | 4     |   |
| 19 | 3957.7 | 3940.7 | 3939.7 | I     | 402.2   | 221.2   | 385.2   | 384.2   | 3     |   |
| 20 | 4185.8 | 4168.8 | 4167.8 | N     | 286.2   | 174.2   | 271.2   | 271.2   | 2     |   |
| 21 | 4413.9 | 4396.9 | 4395.9 | R     | 175.1   | 127.1   | 158.1   | 158.1   | 1     |   |

## Supplement Methods

### LASER MICRODISSECTION AND MASS SPECTROMETRY

Formalin fixed paraffin embedded (FFPE) renal biopsy materials were sent to the Mayo Clinic renal biopsy laboratory for diagnosis of membranous nephropathy. For each case, 10 $\mu$ M thick paraffin sections were obtained and mounted on PEN membrane laser microdissection slides. The sections were deparaffinized using xylene and alcohol. Using a Zeiss Palm Microbeam microscope and Robopalm software, multiple glomeruli were microdissected to reach approximately 250-500,000 $\mu$ M<sup>2</sup> per case, and catapulted into 35 $\mu$ l of digest buffer (100mM Tris, pH 8.5/0.002% Zwittergent Z3-16) in the cap of a 0.5 ml tube. The tube was removed from the collection plate and spun at 14000g x 2minutes. The samples were frozen until all samples were collected. Upon thawing, samples were heated to 98°C, then proteins were reduced and alkylated by sequential addition of TCEP (Tris(2-carboxyethyl) phosphine hydrochloride) and iodoacetamide to 10mM for 30 minutes each. Trypsin (0.05  $\mu$ g) was added to each tube and proteins were digested overnight at 37°C for 16-18 hours. After digestion, the samples were acidified with trichloroacetic acid, dried down and resolubilized with A solvent for mass spectrometry.

The trypsin digested peptides were identified by nano-flow liquid chromatography electrospray tandem mass spectrometry (nanoLC-ESI-MS/MS) using a Thermo Scientific Q-Exactive Mass Spectrometer (Thermo Fisher Scientific, Bremen, Germany) coupled to a Thermo Ultimate 3000 RSLCnano HPLC system. The peptide mixture was loaded onto a 250nl OPTI-PAK trap (Optimize Technologies, Oregon City, OR) custom packed with Michrom Magic C 8, 5 $\mu$ m solid phase (Michrom Bioresources, Auburn, CA). Chromatography was performed using 0.2 % formic acid in both the A solvent (98%water/2%acetonitrile) and B solvent (80% acetonitrile/10% isopropanol/10% water), and a 5%B to 40%B gradient over 90 minutes at 400 nl/min through a PicoFrit (New Objective, Woburn, MA) 100 $\mu$ m x 35cm column handpacked with Agilent Poroshell 120 EC C18 packing. The Q-Exactive mass spectrometer experiment was a data dependent set up with the MS1 survey scan from 340-1500 m/z at resolution 70,000 (at 200m/z), followed by HCD MS/MS scans on the top 15 ions having a charge state of +2, +3, or +4, at resolution 17,500. The ions selected for MS/MS were placed on an exclusion list for 30 seconds. The MS1 AGC target was set to 1e6 and the MS2 target is set to 1e5 with max ion inject times of 50ms for both.

## DATABASE SEARCHING

Tandem mass spectra was extracted by msconvert version 3.0.9134. Charge state deconvolution and deisotoping was not performed. All MS/MS samples were analyzed using Mascot (Matrix Science, London, UK; version 2.4.0) and X! Tandem (The GPM, thegpm.org; version X!Tandem Sledgehammer (2013.09.01.1)). Mascot and X! Tandem were set up to search a Swissprot human database with reverse decoy (40570 entries) assuming the digestion enzyme strict trypsin and with a fragment ion mass tolerance of 0.020 Da and a parent ion tolerance of 10.0 PPM. Glu->pyro-Glu of the n-terminus, ammonia-loss of the n-terminus, gln->pyro-Glu of the n-terminus, oxidation of methionine is specified in X! Tandem as variable modifications and carbamidomethyl of cysteine was specified as a fixed modification. Oxidation of methionine and carbamidomethyl of cysteine were specified in Mascot as variable modifications and fixed modifications respectively.

CRITERIA FOR PROTEIN IDENTIFICATION Scaffold (version Scaffold\_4.8.3, Proteome Software Inc., Portland, OR) was used to validate MS/MS based peptide and protein identifications. Peptide identifications were accepted if they could be established at greater than 95.0% probability by the Scaffold Local FDR algorithm. Protein identifications were accepted if they could be established at greater than 95.0% probability and contained at least 2 identified peptides. Protein probabilities were assigned by the Protein Prophet algorithm.<sup>7</sup>The protein decoy false discovery rate (FDR) was <1.5. In general, over 1500-2500 protein were identified in each sample. Proteins that contain similar peptides and cannot be differentiated based on MS/MS analysis alone were grouped to satisfy the principles of parsimony. Proteins sharing significant peptide evidence were grouped into clusters. Protein comparisons were made with ratios of Scaffold normalized total spectral counts. The 'Spectra' value indicates the total number of mass spectrum collected on the mass spectrometer and matched to the protein using the proteomics software. A higher number of mass spectra is indicative of greater abundance and will typically yield greater amino acid sequence coverage. A higher mass spectra value also indicates a higher confidence in the protein identification.

#### IMMUNOHISTOCHEMICAL STAINING FOR EXOSTOSIN 1 (EXT1), EXOSTOSIN 1 (EXT2) AND EXOSTOSIN-LIKE 2 (EXTL2):

Tissue sectioning and immunohistochemical (IHC) staining was performed at the Pathology Research Core (Mayo Clinic, Rochester, MN) using the Leica Bond RX stainer (Leica). FFPE tissues were sectioned at 5 microns and IHC staining was performed on-line. Slides for the EXT1 stain were retrieved for 20 minutes using Epitope Retrieval 2 (EDTA; Leica) and incubated in Protein Block (Dako) for 5 minutes. The EXT1 primary antibody (rabbit polyclonal, Thermo Scientific #PA5-60699) and EXT2 antibody (rabbit polyclonal; Abcam) was diluted to 1:100 in Background Reducing Diluent (Dako) and incubated for 15 minutes. Slides for the EXTL2 stain were retrieved for 20 minutes using Epitope Retrieval 1 (Citrate; Leica) and incubated in Protein Block (Dako) for 5 minutes. The EXTL2 primary antibody (rabbit polyclonal, Origene #TA590761) was diluted to 1:1400 in Background Reducing Diluent (Dako) and incubated for 15 minutes. The detection system used was Polymer Refine Detection System (Leica). This system includes the hydrogen peroxidase block, post primary and polymer reagent, DAB, and Hematoxylin. Immunostaining visualization was achieved by incubating slides 10 minutes in DAB and DAB buffer (1:19 mixture) from the Bond Polymer Refine Detection System. To this point, slides were rinsed between steps with 1X Bond Wash Buffer (Leica). Slides were counterstained for five minutes using Schmidt hematoxylin and molecular biology grade water (1:1 mixture), followed by several rinses in 1X Bond wash buffer and distilled water, this is not the hematoxylin provided with the Refine kit. Once the immunochemistry process was completed, slides were removed from the stainer and rinsed in tap water for five minutes. Slides were dehydrated in increasing concentrations of ethyl alcohol and cleared in 3 changes of xylene prior to permanent cover slipping in xylene-based medium.

#### IMMUNOFLUORESCENCE STAINING FOR EXT1 AND EXT2

Immunofluorescence staining was performed on FFPE sections retrieved for 30 min using target retrieval solution high pH (Dako). The EXT1 primary antibody (rabbit polyclonal, Thermo Scientific #PA5-60699) and EXT2 primary antibody (rabbit polyclonal; Abcam) were diluted to 1:100 in blocking solution (2% fetal calf serum and 2% normal goat serum) and incubated overnight at 4°C with retrieved biopsy sections. Next, the slides were incubated with goat Alexa488-conjugated anti-rabbit Fab IgG antibodies as secondary antibody (Life technologies). Finally, slides were mounted in mounted medium (Thermo Scientific) and covered with LDS2460EP cover glasses. Stained sections were evaluated by using inverse microscope Olympus IX83.



## WESTERN BLOTTING

The protein samples, recombinant human EXT1, recombinant human EXT1/EXT2 heterodimer (both R&D Systems) and recombinant human PLA2R1 (Origene Technologies), were diluted with non-reducing Laemmli sample buffer (Bio-Rad) and boiled for 5 min. Samples were loaded into Criterion 4-15% TGX gels (Bio-Rad) and electrophoresed in Tris-glycine-SDS running buffer. Proteins were transferred to poly (vinylidene difluoride) membranes according to standard protocols, then membranes were blocked with Pierce Protein-Free Blocking buffer (Thermo Scientific). Membranes were incubated overnight at 4°C with sera from patients, controls (dilution 1:50) and rabbit polyclonal antibodies against EXT1 and EXT2 (Thermo Scientific and Abcam, respectively). Subsequently, blots were washed and incubated for 2 h at room temperature with goat anti-human IgG, HRP conjugate (Millipore) or with goat anti-rabbit HRP conjugated secondary antibody. Immunoreactive proteins were visualized with SuperSignal West Pico Chemiluminescent substrate (Pierce) followed by luminescence detection with Ozyme Syngene LED imager.

**Slot blot native blotting.** Protein slot blotting was done using Bio-Dot SF assembly apparatus (Bio-Rad). EXT1 and EXT1/2 proteins were added to the wells. We used nitrocellulose membrane to slot recombinant EXT1 and EXT1/2 proteins under vacuum. All blocking and washing steps of the membrane were done according to manufacturer's instruction. Subsequently, membranes were removed from the apparatus and small pieces with antigens were prepared for overnight incubation with sera from patients (dilution 1:50) and rabbit polyclonal antibodies against EXT1 and EXT2. Subsequently slots were washed and incubated with goat-anti human or goat anti-rabbit IgG, AP conjugate (Sigma). Immunoreactive proteins were visualized with BCIP/NBT liquid substrate system (Sigma).

**Table 1: Clinical and laboratory findings of Validation Cohort**

| N°                                                       | Code            | Year of biopsy | Exostosin | Age at kidney biopsy/<br>Gender/<br>Ethnicity | Rash/Arthritis/Other                | Serum Creatinine (mg/dL) | Proteinuria (g/24 hours) | C3 (0.74-1.43)/<br>C4 (0.19-0.43g/L) | ANA/ dsDNA/<br>Other*    | Clinical presentation** |
|----------------------------------------------------------|-----------------|----------------|-----------|-----------------------------------------------|-------------------------------------|--------------------------|--------------------------|--------------------------------------|--------------------------|-------------------------|
| <b>1 "Primary" (double negative PLA2R and THSD7A) MN</b> |                 |                |           |                                               |                                     |                          |                          |                                      |                          |                         |
| 1                                                        | T2N00129        | 2012           | -         | 28/M/African                                  | N/N/N                               | 0.7                      | 5.3                      | 2.18/0.62                            | 80/neg/NS                | Nephrotic Sd            |
| 2                                                        | I2N00288        | 2012           | -         | 58/M/African                                  | N/N/N                               | 1                        | 2.9                      | 1.19/0.49                            | ANA neg/neg/NS           | Nephrotic Sd            |
| 3                                                        | 14TN330         | 2014           | -         | 61/M/Caucasian                                | N/N/ polyneuropathy,<br>Sjögren     | 0.8                      | 4.8                      | NA/NA                                | ANA neg/neg/NS           | Nephrotic Sd            |
| 4                                                        | 15TN00498       | 2015           | -         | 27/F/African                                  | N/N/N                               | 0.6                      | 6.1                      | NA                                   | NA                       | Nephrotic Sd            |
| 5                                                        | 11N00262        | 2011           | -         | 54/F/Caucasian                                | N/N/N                               | 0.6                      | 12                       | 1.7/0.41                             | 1280/neg/Anti-centromere | Nephrotic Sd            |
| 6                                                        | T08E00791       | 2008           | -         | 40/F/Caucasian                                | Y/N/N                               | 0.9                      | 17.3                     | 1.12/0.26                            | 80/neg/neg               | Nephrotic Sd            |
| 7                                                        | 05H07788        | 2005           | -         | 58/F/Sri Lanka                                | N/N/Y myalgias,<br>polyadenopathies | 0.7                      | 2.8                      | 1.47/NA                              | 200/neg/neg              | Nephrotic Sd            |
| 8                                                        | 09H05897        | 2008           | -         | 42/M/Caucasian                                | Y/N/Y Raynaud                       | 0.9                      | 0.75                     | NA/NA                                | 160/neg/neg              | Proteinuria             |
| 9                                                        | 08H0466         | 2008           | -         | 76/M/Maghrebian                               | N/N/N                               | 1                        | 6.0                      | NA/NA                                | ANA neg/neg/neg          | Nephrotic Sd            |
| 10                                                       | 07E 00106       | 2007           | -         | 34/F/Caucasian                                | N/N/Raynaud, sicca<br>syndrome      | 0.7                      | 1.5                      | 0.93/0.18                            | 160/neg/neg              | Proteinuria             |
| 11                                                       | 06H06087        | 2006           | -         | 84/F/Caucasian                                | N/N/N                               | 0.7                      | 0.7                      | 0.97/0.13                            | NA                       | Nephrotic Sd            |
| 12                                                       | 18TN00253       | 2018           | -         | 26/F/African                                  | N/N/N                               | 0.6                      | 3.4                      | 1.23/0.20                            | 1280/neg/SSA             | Proteinuria             |
| 13                                                       | I2N00418        | 2012           | -         | 41/M/African                                  | N/N/N                               | 0.9                      | 0.2                      | 1.12/0.12                            | 640/neg/NS               | Nephrotic Sd            |
| 14                                                       | <b>06H11586</b> | <b>2006</b>    | +         | 24/F/Maghrebian                               | N/N/N                               | 0.6                      | 1.2                      | 0.96/0.17                            | ANA neg/neg/SSA          | Nephrotic Sd            |

|                           |                   |             |   |                         |                                  |     |      |             |                       |                       |
|---------------------------|-------------------|-------------|---|-------------------------|----------------------------------|-----|------|-------------|-----------------------|-----------------------|
|                           | <b>12N271</b>     | <b>2012</b> | + |                         | Y/Y/thrombocytopenic purpura     | 0.5 | 1.8  | 0.73/0.11   | 1280/neg/Sm.RNP.SSA.B | Clinical lupus        |
| 15                        | <b>18TNN00285</b> | <b>2018</b> | + | 70/M/African            | N/N/N                            | 2.2 | 13.3 | 0.70/0.30   | 1280/neg/Sm.RNP.SSA   | Nephrotic Sd          |
| 16                        | <b>T07H03197</b>  | <b>2007</b> | + | 21/F/Caucasian          | N/N/N                            | 0.7 | NA   | 1.43/0.35   | 1000/neg/RNP          | Nephrotic Sd          |
|                           | <b>T08H07707</b>  | <b>2008</b> | + |                         | Y/N/Y pleuritis                  | 0.7 | 5.7  | 0.86/0.37   | 320/neg/RNP           | Clinical lupus        |
|                           | <b>18TN00273</b>  | <b>2018</b> | + |                         | N/N/N                            | 0.5 | 4.8  | 0.71/0.12   | 1200/neg/RNP          | Asymptomatic lupus    |
|                           |                   |             |   |                         |                                  |     |      |             |                       |                       |
|                           |                   |             |   |                         |                                  |     |      |             |                       |                       |
| <b>2.Class V lupus MN</b> |                   |             |   |                         |                                  |     |      |             |                       |                       |
| 17                        | <b>17TN00433</b>  | <b>2017</b> | + | 20/F/Caucasian Hispanic | N/Y/Y                            | 0.5 | 6.3  | 1.04/0.30   | No/8/SSA.Ro           | Clinical lupus        |
| 18                        | <b>18TN00197</b>  | <b>2018</b> | + | 49/F/African            | N/N/thrombocytopenic purpura     | 0.7 | 2.6  | N/0.15      | 320/ neg/Sm. SSA. RNP | Proteinuria           |
| 19                        | <b>T08H10866</b>  | <b>2008</b> | + | 27/F/African            | Y/Y/N                            | 0.8 | 5.3  | 1.26/low C4 | 1280/NA/SSA           | Clinical lupus        |
|                           | <b>17TN00426</b>  | <b>2017</b> | + |                         | Y/N/N                            | 0.7 | 0.5  | 0.68/0.10   | 1280/26/Sm. SSA. RNP  | Clinical lupus        |
| 20                        | <b>T05H08855</b>  | <b>2005</b> | + | 26/F/Guyane             | Y/Y/Y lung emboli                | 0.8 | 10   | 0.52/0.04   | 1000/340/Sm. SSA. RNP | Clinical lupus        |
|                           | <b>T06H02989</b>  | <b>2006</b> | + |                         | N/N/N                            | 0.8 | 2    | 0.71/0.08   | 1000/68/SSA           | Asymptomatic lupus    |
| 21                        | <b>T00H02015</b>  | <b>2000</b> | + | 46/F/African            | Y/Y/Y sicca syndrome             | 0.5 | 3    | 0.74/0.2    | 1000/neg/RNP          | APLS & clinical lupus |
| 22                        | <b>T01H01069</b>  | <b>2001</b> | + | 38/F/African            | N/N/Y hemolysis<br>Coombs pos    | 0.7 | 7    | N/0.16      | 1000/23/SSA           | Renal lupus           |
| 23                        | <b>T13N00303</b>  | <b>2013</b> | + | 38/M/African            | N/Y/Y lung, lymph nodes          | 1.0 | 1.4  | N/N         | 1280/neg/Sm. RNP. SSA | Clinical lupus        |
|                           | <b>17TN00061</b>  | <b>2017</b> | + |                         | N/N/Y lymph nodes                | 0.7 | 2.8  | 0.19/0.07   | 1280/neg/Sm. RNP. SSA | Clinical lupus        |
| 24                        | <b>T13N00177</b>  | <b>2013</b> | + | 45/F/African            | Y/Y/Y pericarditis               | 0.7 | 3.2  | 0.85/0.15   | 1280/neg/Sm.RNP       | Clinical lupus        |
| 25                        | 14TN00361         | 2014        | - | 32/F/African&Caucasian  | Y/Y/N                            | 0.7 | 0.7  | 0.62/0.15   | 1280/119/SSA          | Clinical lupus        |
| 26                        | T02H10849         | 2002        | - | 40/F/Maghrebian         | Y/Y/Y vasculitis                 | 0.7 | 1.1  | 0.49/0.08   | 4000/27/neg           | Clinical lupus        |
| 27                        | T03H00890         | 2003        | - | 41/F/Caucasian          | Y/Y/N                            | 0.9 | <0.1 | 1.09/0.29   | 200/neg/NS            | Clinical lupus        |
| 28                        | T04H09991         | 2004        | - | Pakistani               | N/N/Y diarrhea, lymph node       | 1.0 | 6.1  | N/ 0.04     | 1000/neg/Sm. RNP      | Clinical lupus        |
| 29                        | T11N00384         | 2011        | - | 35/F/Guyana             | N/Y/N                            | 0.7 | 0.4  | 0.93/0.13   | 1280/150/SSA          | Clinical lupus        |
| 30                        | T05H01461         | 2005        | - | 54/M/Maghrebian         | Y/N/Y colitis, spinal amyotrophy | 0.7 | 0.4  | 0.51/0.05   | NA/NA                 | Clinical lupus        |
| 31                        | 18TN00204         | 2018        | - | 58/F/African            | N/Y/Y pericarditis               | 0.6 | 2    | 1.68/0.33   | 1280/neg/Sm. RNP      | Clinical lupus        |
| 32                        | T12N00232         | 2012        | - | 45/F/Caucasian          | Y/Y/Y neurolupus                 | 0.5 | 3    | 0.74/0.22   | 320/24/NS             | Clinical lupus        |
| 33                        | 17TNN00327        | 2017        | - | 35/M/African            | Y/Y/Y                            | 0.6 | 0.8  | 0.58/0.12   | 1280/157/Sm. RNP.SSA  | Clinical lupus        |

|                                                  |           |         |   |                         |                                   |      |      |                |                       |                       |
|--------------------------------------------------|-----------|---------|---|-------------------------|-----------------------------------|------|------|----------------|-----------------------|-----------------------|
| 34                                               | 12N00258  | 2012    | - | 55/F/Caucasian          | N/Y/Sjögren                       | 0.7  | 8.9  | 1.28/0.24      | 160/neg/SSA           | Clinical lupus        |
| <b>3. Mixed class (V+III/IV) lupus nephritis</b> |           |         |   |                         |                                   |      |      |                |                       |                       |
| 35                                               | 13N00201  | 2013    | + | 34/M/African            | Y/N/Y stroke                      | 1.1  | 1.4  | 0.78/0.04      | 1280/231/Sm.RNP       | Clinical lupus        |
| 36                                               | T03H10353 | 2003    | - | 48/F/African            | N/Y/Y seritis, Sjögren            | 1.1  | 1    | 0.66/0.18      | 1000/180/NS           | Clinical lupus        |
| 37                                               | 03H00679  | 2003    | - | 17/F/African            | N/N/ Y seritis, pseudo-lymphoma   | 1.5  | 6    | 0.51/0.03      | NA                    | Clinical lupus        |
| 38                                               | 07E 00028 | 2007    | - | 16/F/ Caucasian         | NA                                | NA   | NA   | NA             | NA                    | Proteinuria           |
| 39                                               | T1N00246  | 2011    | - | 42/F/Chinese            | N/N/Y Raynaud syndrome            | 0.6  | 5.9  | 1.08/0.21      | 1280/neg/neg          | Clinical lupus        |
| 40                                               | T13N00124 | 2013    | - | 38/F/African            | Y/Y/Y hematological, pancreatitis | 0.7  | 5.0  | 0.81/0.18      | NA/985/RNP.SSA        | Nephrotic Sd          |
| 41                                               | T13N00089 | 2013    | - | 64/F/Maghrebian         | NA                                | ESKD | ESKD | NA             | NA                    | ESKD                  |
| 42                                               | 14TN00098 | 2014    | - | 49/M/Asian (Vietnamese) | N/Y/ hematological, pericarditis  | 1.9  | 0.8  | 0.14/0.02      | 2800/44/ECT           | Clinical lupus        |
| 43                                               | 14TN00109 | 2014    | - | 29/ F/Asian             | Y/Y/Y seritis, hematological      | 0.8  | 1.55 | 0.42/0.06      | 640/46/SSA            | Proteinuria/hematuria |
|                                                  | 14TN00312 | sept-14 | - |                         |                                   | 1    | 0.4  | 0.96/0.24      | NA/NA                 | Asymptomatic lupus    |
| 44                                               | 14TN00316 | 2014    | - | 26/M/Caucasian          | Y/N/Y hematological&SAPL          | 0.9  | 1.1  | 0.17/0.02      | 1280/50/RNP.SSA       | Clinical lupus        |
| 45                                               | 17N00320  | 2017    | - | 55/F/Maghrebian         | Y/Y/N                             | 1.3  | 2    | C3 normal/0.18 | 160/neg/NS            | Asymptomatic lupus    |
| 46                                               | 18TN00279 | 2018    | - | 30/F/Asian (Cambodian)  | Y/Y/Raynaud                       | 0.8  | 3.0  | 0.61/0.07      | 1280/109/Sm. RNP. SSA | Clinical lupus        |
| 47                                               | 14TN00235 | 2014    | - | 43/F/Caucasian          | Y/Y/Y hematological, neurolupus   | 0.8  | 3.3  | 0.6/0.08       | 320/50/NS             | Nephrotic Sd          |
| 48                                               | 17834     | 2000    | - | 34/M/Maghrebian         | Y/Y/Y                             | 66   | 0.2  | 0.47/0.10      | 1000/16/RNP.SSA       | Asymptomatic lupus    |

\*ANA=antinuclear antibody, dsDNA= anti-double stranded DNA antibody; RNP=ribonucleoprotein, SSA/B=Sjögren syndrome antibody A/B, NA=not available, NS=not specified

\*\*Sd=syndrome

**Table 2: Kidney biopsy findings of Validation Cohort**



| N°                                                        | Code       | Glomeruli/<br>sclerosed | Mesangial or endocapillary<br>hypercellularity* | Interstitial Inflammation/<br>IFTA | Arteries         | Immunofluorescence<br>microscopy  | Pathological diagnosis | IgG Subclass |
|-----------------------------------------------------------|------------|-------------------------|-------------------------------------------------|------------------------------------|------------------|-----------------------------------|------------------------|--------------|
| <b>1. "Primary" (double negative PLA2R and THSD7A) MN</b> |            |                         |                                                 |                                    |                  |                                   |                        |              |
| 1                                                         | T2N00129   | 6/0                     | Not present                                     | 0/0                                | Normal           | G subepithelial                   | MN stage I             | Ig4=3>1      |
| 2                                                         | 12N00288   | 19/6                    | Not present                                     | Mild/mild                          | Intimal fibrosis | G subepithelial, mesangial        | MN stage II            | IgG1=3>2     |
| 3                                                         | 14TN330    | 7/0                     | Not present                                     | 0/0                                | Intimal fibrosis | G, A (weak), C3 subepithelial     | MN stage II            | IgG1         |
| 4                                                         | 15TN00498  | 18/1                    | Not present                                     | 0/0                                | Intimal fibrosis | G subepithelial                   | MN stage I             | IgG4         |
| 5                                                         | 11N00262   | 26/0                    | Not present                                     | 0/0                                | Normal           | G,C3 subepithelial                | MN stage I             |              |
| 6                                                         | T08E00791  | 19/0                    | Not present                                     | 0/0                                | Normal           | G,C3,C1q subepithelial            | MN stage I             |              |
| 7                                                         | 05H07788   | 5/1                     | Not present                                     | 0/0                                | Normal           | G,C3,C1q subepithelial,           | MN stage I , segmental |              |
| 8                                                         | 09H05897   | 12/0                    | Not present                                     | 0/0                                | Normal           | G,M,C3 subepithelial              | MN stage II,III        |              |
| 9                                                         | 08H0466    | 15/4                    | Not present                                     | Mild/mild                          | Intimal fibrosis | G subepithelial                   | MN stage II            |              |
| 10                                                        | 07E 00106  | 22/4                    | Not present                                     | 0/mild                             | Normal           | G subepithelial                   | MN stage III           |              |
| 11                                                        | 06H06087   | 8/3                     | Not present                                     | Severe (CLL)/mild                  | Normal           | G,C3 subepithelial kappa & lambda | MN stage III           |              |
| 12                                                        | 18TN00253  | 9/0                     | Not present                                     | 0/0                                | Normal           | G,M,C3                            | MN stage I             | IgG4>G1=G2   |
| 13                                                        | 12N00418   | 28/1                    | Not present                                     | 0/mild                             | Normal           | G subepithelial, C3 arterioles    | MN stage II            | IgG1>3>2     |
| 14                                                        | 06H11586   | 31/0                    | Prolif. mes., small crescents                   | 0/mild                             | Normal           | G, C3 subepithelial               | MN stage I-II          |              |
|                                                           | 12N271     | 22/1                    | Not present                                     | 0/0                                | Normal           | G,C3 subepithelial                | MN stage I-II          |              |
| 15                                                        | 18TNN00285 | 10/1                    | Not present                                     | 0/0                                | Normal           | G,C3 subepithelial                | MN stage I             | IgG4>G1      |
| 16                                                        | T07H03197  | 19/0                    | Not present                                     | 0/0                                | Normal           | G, C3 subepithelial; M, mesangial | MN stage I             |              |
|                                                           | T08H07707  | 26/0                    | Prolif.endo., thrombi                           | Mild/0                             | Normal           | G,A,M,C3,C1q                      | Class III S-A+ V       |              |
|                                                           | 18TN00273  | 18/1                    | Not present                                     | 0/0                                | Normal           | G,C3,C1q                          | Class V                |              |

| 2. Class V lupus MN |            |      |                          |                        |                      |                                                   |                       |             |
|---------------------|------------|------|--------------------------|------------------------|----------------------|---------------------------------------------------|-----------------------|-------------|
| 17                  | 17TN00433  | 29/0 | Not present              | 0/0                    | Normal               | G,A,M,C3                                          | MN stage I            |             |
| 18                  | 18TN00197  | 12/0 | Not present              | 0/0                    | Normal               | G, C3, C1q                                        | MN stage I            | IgG1 > IgG2 |
| 19                  | T08H10866  | 15/0 | Not present              | 0/0                    | Normal               | G,C3,C1q subepithelial, M mesangial               | Class V               |             |
|                     | 17TN00426  | 8/0  | Not present              | 0/0                    | Normal               | G,C3                                              | MN stage I            |             |
| 20                  | T05H08855  | 10/0 | Prolif. endo., crescents | Mild/mild              | Normal               | G,A,C3,C1q                                        | Class IV-(G)A+ V      |             |
|                     | T06H02989  | 6/0  | Prolif. decreased        | 0/0                    | Normal               | G,A,C3,C1q                                        | Class V               |             |
| 21                  | T00H02015  | 10/1 | Not present              | 0/0                    | Normal               | G,A,C3,C1q subepithelial, G,M mesangial           | Class V               |             |
| 22                  | T01H01069  | 8/0  | Not present              | 0/0                    | Normal               | G, (A), C3, C1q subepithelial, C1q endomembranous | Class V               |             |
| 23                  | T13N00303  | 20/0 | Not present              | 0/0                    | Normal               | G,C3,C1q                                          | MN stage 1 (Class V?) | IgG1        |
|                     | 17TN00061  | 34/2 | Not present              | Severe/0               | Normal               | G,C3, (A), (C1q)                                  | MN stage 2            | IgG1,2,3 &4 |
| 24                  | T13N00177  | 11/0 | Not present              | 0/0                    | No artery            | G,C3 subepithelial, G M C3C1q mesangial           | Class V               |             |
| 25                  | 14TN00361  | 15/2 | Mild mes. prolif.        | 0/0                    | Normal               | G,C3, C1q, subepithelial; GAMC3C1q mesangial      | Class V               |             |
| 26                  | T02H10849  | 9/2  | Not present              | 0/mild                 | Normal               | G,A, C3,C1q subepithelial, M mesangial            | Class V               |             |
| 27                  | T03H00890  | 23/2 | Mild mes. prolif.        | Mild/mild              | Normal               | G,A,M,C3,C1q subepithelial, mesangial(small)      | Class V               |             |
| 28                  | T04H09991  | 17/2 | Prolif. mes.             | Focal /0               | Mild endarteritis    | G,A,C3, C1q subepith, G, A, M, C3 subendothelial  | Class V               |             |
| 29                  | T11N00384  | 08/1 | Not present              | 0/0                    | Intimal fibrosis     | G subepithelial, M, C3 parietal                   | Class V               |             |
| 30                  | T05H01461  | 19/3 | Not present              | mild/mild              | Fibrous endarteritis | G,A,C3,C1q, subepithelial and vascular            | Class V               |             |
| 31                  | 18TN00204  | 27/2 | Not present              | 0/mild                 | Intimal fibrosis     | G,A,C3 subepithelial                              | MN stage 1 (Class V?) |             |
| 32                  | T12N00232  | 18/5 | Not present              | 0/APS-related fibrosis | Thrombosis (APS)     | G, C3, C1q subepithelial                          | Class V + APS         |             |
| 33                  | 17TNN00327 | 15/2 | Not present              | 0/mild                 | Normal               | G,C3 subepithelial                                | Class V               | IgG3        |
| 34                  | 12N00258   | 20/2 | Not present              | 0/0                    | Intimal fibrosis     | G subepithelial, mesangial                        | MN stage 1            | IgG4=2>1=3  |

| <b>3. Mixed class (V+III/IV) lupus nephritis</b> |              |      |                                  |                        |                     |                                                    |                                 |            |
|--------------------------------------------------|--------------|------|----------------------------------|------------------------|---------------------|----------------------------------------------------|---------------------------------|------------|
| 35                                               | 13N00201     | 6/0  | Prolif.mes. (1G)+ 1 crescent     | Severe (C/M)/tubulitis | Intimal fibrosis    | G,C3 subepithelial, M,C3 mesangial                 | Class III+V                     | IgG2>1=3=4 |
| 36                                               | T03H10353    | 23/2 | Prolif.endo., necrosis, crescent | Mild/mild              | Endarteritis (APLS) | NA                                                 | Class III+V                     |            |
| 37                                               | 03H00679     | 26/0 | Prolif.endo., mes., crescent     | 0/mild                 | One thrombosis      | G,A,M,C3,C1qsubepithelial, mesangial               | Class III+V                     |            |
| 38                                               | 07E 00028    | 14/5 | Not present                      | 0/mild                 | Normal              | G,A,C3,C1q subepithelial                           | Class IVc + V                   |            |
| 39                                               | T1N00246     | 24/0 | Prolif. endo.                    | 0/mild                 | Intimal fibrosis    | G,M, C3, C1q subepithelial                         | Class III + V stage II, III     |            |
| 40                                               | T13N00124    | 18/3 | Scars, synechias                 | Mild/o                 | N                   | G,A,M,C3,C1q subepithelial and endomembranous      | Class IV-S (C:68%) + V          |            |
| 41                                               | T13N00089    | 18/9 | Prolif. endo. &extracapillary    | Severe/severe          | Intimal fibrosis    | G,A,C3 subepithelial                               | Class IV-G (A, 27%; C, 78%) + V |            |
| 42                                               | 14TN00098    | 16/2 | Prolif. endo. & thrombi          | 0/mild                 | Intimal fibrosis    | G=C1q> A=C3, subepithelial and endomembranous      | Class IV-S (A) + V              |            |
| 43                                               | 14TN00109    | 22/1 | Prolif. endo. & extracapillary   | Mild/0                 | Intimal fibrosis    | G,A, C3, C1q subepithelial and mes.                | Class III (A,14%; C, 27%) + V   |            |
|                                                  | 14TN00312    | 21/5 | Scars                            | 0/0                    | Normal              | G,A,C3 subepithelial, C1Q endomembranous segmental | Class IIIC + V                  |            |
| 44                                               | 14TN00316    | 9/0  | Prolif. endo.                    | 0/0                    | Normal              | G,C1q,C3 subepithelial &endo, A,M endomembranous   | Class IIIA + V                  |            |
| 45                                               | 17N00320     | 11/5 | Not present                      | 0/mild                 | Intimal fibrosis    | G,A subepithelial                                  | Class IVC + V                   |            |
| 46                                               | 18TN00279    | 19/0 | Prolif. endo.                    | Mild/mild              | Normal              | G,A,M,C3,C1q subepithelial & endomembranous        | Class IIIA + V                  |            |
| 47                                               | 14TN00235    | 17/4 | Prolif. endo.                    | 0/mild                 | Normal              | G,A,M,C3,C1q, subepithelial & endo.                | Class IV-G (A/C) + V            |            |
| 48                                               | INSERM 17834 | 21/0 | Prolif. endo. &extracapillary    | Mild/mild              | Intimal fibrosis    | NA                                                 | Class III+V                     |            |

\*Prolif.=proliferation, mes.=mesangial, endo.=endothelial, 1G=one glomerulus
